# Supplementary material for: Evaluation of the Mucosal Immunity Effect of Bovine Viral Diarrhea Virus Subunit Vaccine E2Fc and E2Ft
Source: MDPI journal article supplement (doi:10.3390/ijms24044172), 2023-02-20
Supplement: s1 [file s1]

## Supplementary 1

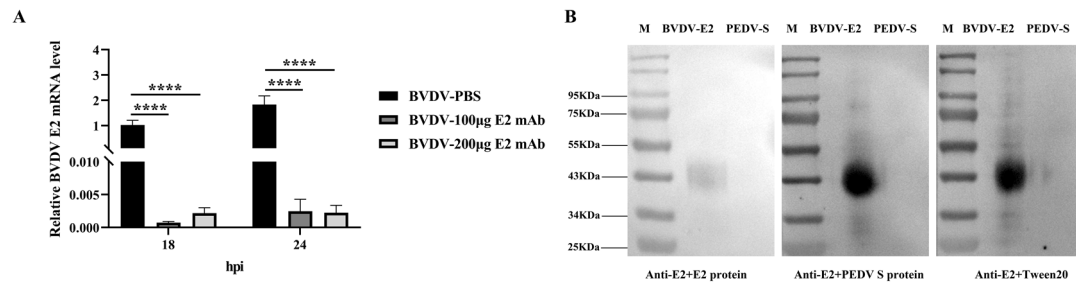

**Figure S1.** Specificity determination of BVDV-E2 mAb. (A) Pre-treated BVDV with PBS, 100µg or 200µg of E2 mAb, infected the MDBK cells and relative E2 gene expressions were detected by RT-qPCR at 18 and 24 hpi. (B) Western blot detection of the reaction to BVDV-E2 or PEDV-S protein using the pre-treated E2 mAb with BVDV E2 protein, PEDV S protein or Tween 20. BVDV: Bovine viral diarrhea virus, PEDV: Porcine epidemic diarrhea virus. hpi: hour post infection. \* $p < 0.05$ , \*\* $p < 0.01$ , \*\*\* $p < 0.001$  and \*\*\*\* $p < 0.0001$ .
