# Supplementary material for: Evaluation of the Mucosal Immunity Effect of Bovine Viral Diarrhea Virus Subunit Vaccine E2Fc and E2Ft
Source: MDPI journal article supplement (doi:10.3390/ijms24044172), 2023-02-20
Supplement: s1 [file s1]

**Supplementary material S2:** The nucleotide sequence of IL-2-E2Fc-6XHis

ctcgaggccaccatgtaccggatgcagctgctgagctgtatcgccctgagcctggccctggtgaccaacagcatgctgcc  
cgcctgcaagccccgacttcagctacgccatcgccaagaacaacgagatcgccccctcggcgccaccggactgactaca  
cagtggtagcaatatacgacggcatgagactgcaagacaccgaggtggctgctggtgcaaggatggcgagataaagt  
acctgatcacatgcgaaagagaagccagatatctggcaatactgcacaccgggactgcccacctccgtcgtgttgaga  
aaattataaagggcaaggagcaggaggacgtcgtggagatggacgacgacttcgagtttgactgtgcccctgcgacgc  
caagccactcgttagaggcaagttaacaccaccctgctgaacggccccgcttccagatggtgtgccccattggatggac  
cggcaccgtgagctgcgcactcgccaacaaggacaccctcgccctgaccgtggtgagaacctacaccagacacaaacc  
attccctaccgccaaggctgtatcacccagaagactatcggaagatctgtacaactgcgacctcggcggaactggac  
ctgcatccccggcgaccaactcagatactgcacggccccgctgaaagctgcaagtgggtcggtataacttctacaaga  
gcgagggcctgccccacttccctattggaaagtgcactgaagaacgagcttggtacagacaggtggacgagaccag  
ttgcaacagagacggcggttctatcgtgctgcacggcagggtgaaatgcaagatcggcgacaccgtggtgcaggtgata  
gcaatggacgacagactcggacccatgccctgtataccccacgagatcattcctccgagggccccggttgagaaaacagc  
ctgcacctcaactataccaaaaccctgaagaataagtaactcagagcccagagacaactacttcaacagtacatgctcaag  
ggcgagtaccagtactggttcgacctggaagtgaccgaccaccacaaggactacttcgccgaaagcctgggcagcggca  
gcgtggacaaggctgttgatcctacctgcaaaaccagccccctgcgattgctgccccccccctgagctgcctggaggacca  
agcgttctcatcttccccccaaacccaaagacaccctgacaatctccggcaccctcgaaagtgcctgcgtcgtggtggac  
gtggggcacgacgacccccgagggttaagttcagctggttcgtggacgacgtggaggtgaacaccgcaacaaccaaaccc  
agagaggaacaatttaattctacctacaggggtggtgagcgtctgagaattcagcatcaggattggaccggaggcaagga  
gtttaaagcaagggtgcacaacgaaggactgccccccccattgtgagaacctctcccgaccaagggacccgcccgg  
gagcctcaagtctacgtcctggctccccctcaggaggagctgagcaagagcaccgtctccctgacctgcatggtgacctc  
cttctaccccgactatattgccgtggagtggcagagaaatggccaaccgagagtgaggataaatacggcaccacacccc  
cccagctcgacgccgatggctcctacttctgtacagccggctgagagtggacagaaattcatggcaggaaggagacac  
ctacacctgtgtcgtgatgcagaggtctgcacaaccactacaccagaaaagcacctccaagtccggcggaagggc  
agcggcagtcaccaccaccacatcactgactcgag
