# Supplementary material for: Evaluation of the Mucosal Immunity Effect of Bovine Viral Diarrhea Virus Subunit Vaccine E2Fc and E2Ft
Source: MDPI journal article supplement (doi:10.3390/ijms24044172), 2023-02-20
Supplement: s1 [file s1]

**Supplementary material S3:** The nucleotide sequence of IL-2-E2Ft-6XHis

ggatccgccaccatgtaccggatgcagctgctgagctgtatgccctgagcctggccctggtgaccaacagcctgccgc  
ttgcaagcctgacttctctacgctatcgctaagaacaacgaaatcgccccctcgggtgctaccggtctgactaccagtgg  
tacgagtactccgacggtatgcgcctgcaagataccgaggtggcgtgtggtgcaaggacggcgaaatcaagtacctgat  
cacctgcgaacgtgaagcccgtacctggccatcctgcacactcgcgctctgcctacctccgtcgtcttcgaaaagatcatc  
aagggttaaggaaacaggaggacgtcgtggagatggacgacgacttcgaatttggtttgtgcccttgtgacgctaagccactg  
gtgcgcggtaagttaacaccaccctgctgaacggccccgcttccagatggtgtgccctatcggatggaccggaaccgt  
gagttgtgctctggctaacaaggacaccctggctttgactgtggtgcgcacctacacccgccacaagccttcccctaccgc  
caaggttgatcacccagaagactatcggagaagatctgtacaactcgcacctcggcggttaactggacctgcatccctggt  
gaccaactccgctacgtcgtatggtcctgtcagtcctgcaagtggcggtgctacaacttctacaagagcgagggactgcct  
cacttccctatcggtaagtgaagctgaagaacgagagtgggtaccgccaggtggacgagaccagctgcaaccgcgacg  
gtgtggctatcgtgctgcacggacgcgtgaagtgaagatcggtagaccgtggtgcaggtgatcgcctatggacgacag  
gctgggtcctatgccttgcacccccacgagatcatcccttctgagggctcctgtggagaagactgcttgcaccttcaactaca  
ccaagaccctgaagaacaagtactacgagccacgcgacaactacttccagcagtacatgctgaagggcgagtaccagta  
ctggttcgatctggaagtgaccgaccaccacaaggactacttgcggaatccctcggaggcggctctatgctctccaagga  
catcatcaagttgctgaacgagcaggtgaacaaggagatgcagtcctccaacctgtacatgtctatgtcctcctggtgctaca  
cccacagcctggacggtgctggcctcttctgttcgaccacgccgctgaagaatacgaacacgccaagaagttgatcatct  
tctgaacgagaacaacgtgcctgtccagctcaccagcatctccgctcctgagcacaagttcgagggcttgacccaaatctt  
ccagaaggcttacgaacacgagcagcacatctccgagtcacatcaacaacatcgtggaccacgccatcaagtccaaggac  
cacgctaccttcaacttcttcagtggtacgtcgccgagcaacacgaagaagaagtcctgttcaaggacatcctggacaag  
atcgagctgatcggaaacgagaaccacgggtctgtacctcgtgaccagtagctgaaggggtatcgccaagtcccgaagtc  
cggcagcggcagtcaccaccaccaccatcactgactcgag
