# Supplementary material for: Evaluation of the Mucosal Immunity Effect of Bovine Viral Diarrhea Virus Subunit Vaccine E2Fc and E2Ft
Source: MDPI journal article supplement (doi:10.3390/ijms24044172), 2023-02-20
Supplement: s1 [file s1]

**Supplementary material S1:** The nucleotide sequence of IL-2-E2-6XHis

ggatccgccaccatgtaccggatgcagctgctgagctgtatcgccctgagcctggccctggtgaccaacagcatgctgcc  
cgcctgcaagcccgacttcagctacgccatcgccaagaacaacgagatcgccccctcggcgccaccggactgactaca  
cagtggtagcaatatacgacggcatgagactgcaagacaccgaggtggctgctggtgcaaggatggcgagataaagt  
acctgatcacatgcgaaagagaagccagatatctggcaatactgcacaccgggcactgcccacctccgtcgtgtttgaga  
aaattataaagggcaaggagcaggaggacgtcgtggagatggacgacgacttcgagtttggactgtgcccctgcgacgc  
caagccactcgttagaggcaagttaacaccaccctgctgaacggccccgctttccagatggtgtgccccattggatggac  
cggcaccgtgagctgcgcactcgccaacaaggacaccctcgccctgaccgtggtgagaacctacaccagacacaaacc  
atttcctaccgccaaggctgtatcacccagaagactatcggaagaagatctgtacaactgcgacctcggcggaaactggac  
ctgcatccccggcgaccaactcagatactgcacggccccgctgaaagctgcaagtgggtcggctataacttctacaaga  
gcgagggcctgccccacttccctattggaaagtgcaaactgaagaacgagctctggctacagacaggtggacgagaccag  
ttgcaacagagacggcggttgctatcgtgctgcacggcagggtgaaatgcaagatcggcgacaccgtggtgcaggtgata  
gcaatggacgacagactcggacccatgccctgtataccccacgagatcattcctccgagggccccggttgagaaaacagc  
ctgcaccttaactataccaaaaccctgaagaataagtactacgagcccagagacaactacttccaacagtacatgctcaag  
ggcgagtaccagtactggttcgacctggaagtgaccgaccaccacaaggactacttcgccgaaagcctgggcagcggca  
gtcaccaccaccaccatcactgactcgag
