# Supplementary material for: Evaluation of the Mucosal Immunity Effect of Bovine Viral Diarrhea Virus Subunit Vaccine E2Fc and E2Ft
Source: Int J Mol Sci. 2023 Feb 20;24(4):4172. doi: 10.3390/ijms24044172 (PMC9965503; doi:10.3390/ijms24044172)
Supplement: Supplementary file 1 [file ijms-24-04172-s001.zip]

Archive with 4 entries (4 files):
- Supplementary Figure S1.pdf
- Supplementary Material S1.pdf
- Supplementary Material S2.pdf
- Supplementary Material S3.pdf
